# Supplementary material for: Design and Validation of Endophthalmitis Infectivity Measurement Algorithm in Post Cataract Acute Endophthalmitis: EMS Report No. 6
Source: PubMed Central journal article supplement (PMC11316448; doi:10.1167/tvst.13.8.10), 2024-08-07

**Supplementary Figure 1.** Performance evaluation of CHAID using ROC curve

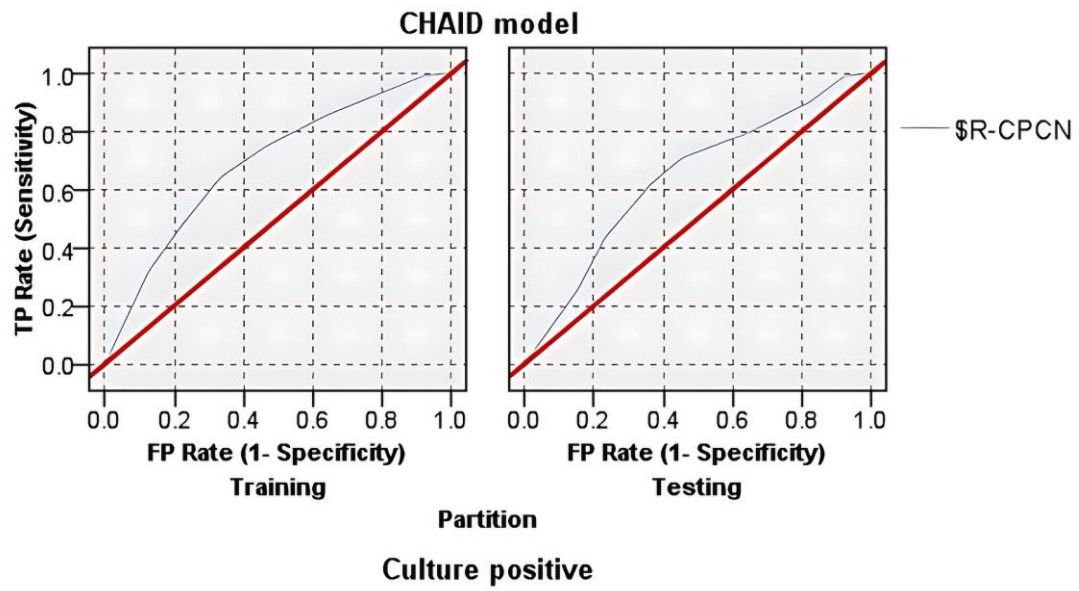

Supplement: tvst-13-8-10_s001.pdf [file tvst-13-8-10_s001.pdf]
